# Supplementary material for: Preparation and Characterization of Electrostatically Crosslinked Polymer–Liposomes in Anticancer Therapy
Source: PubMed Central journal article supplement (PMC6032249; doi:10.3390/ijms19061615), 2018-05-30
Supplement: ijms-19-01615-s001.pdf [file ijms-19-01615-s001.pdf]

# Supplementary Materials: Preparation and Characterization of Electrostatically Crosslinked Polymer-Liposomes in Anticancer Therapy

Yi-Ting Chiang, Sih-Ying Lyu, Yu-Han Wen and Chun-Liang Lo

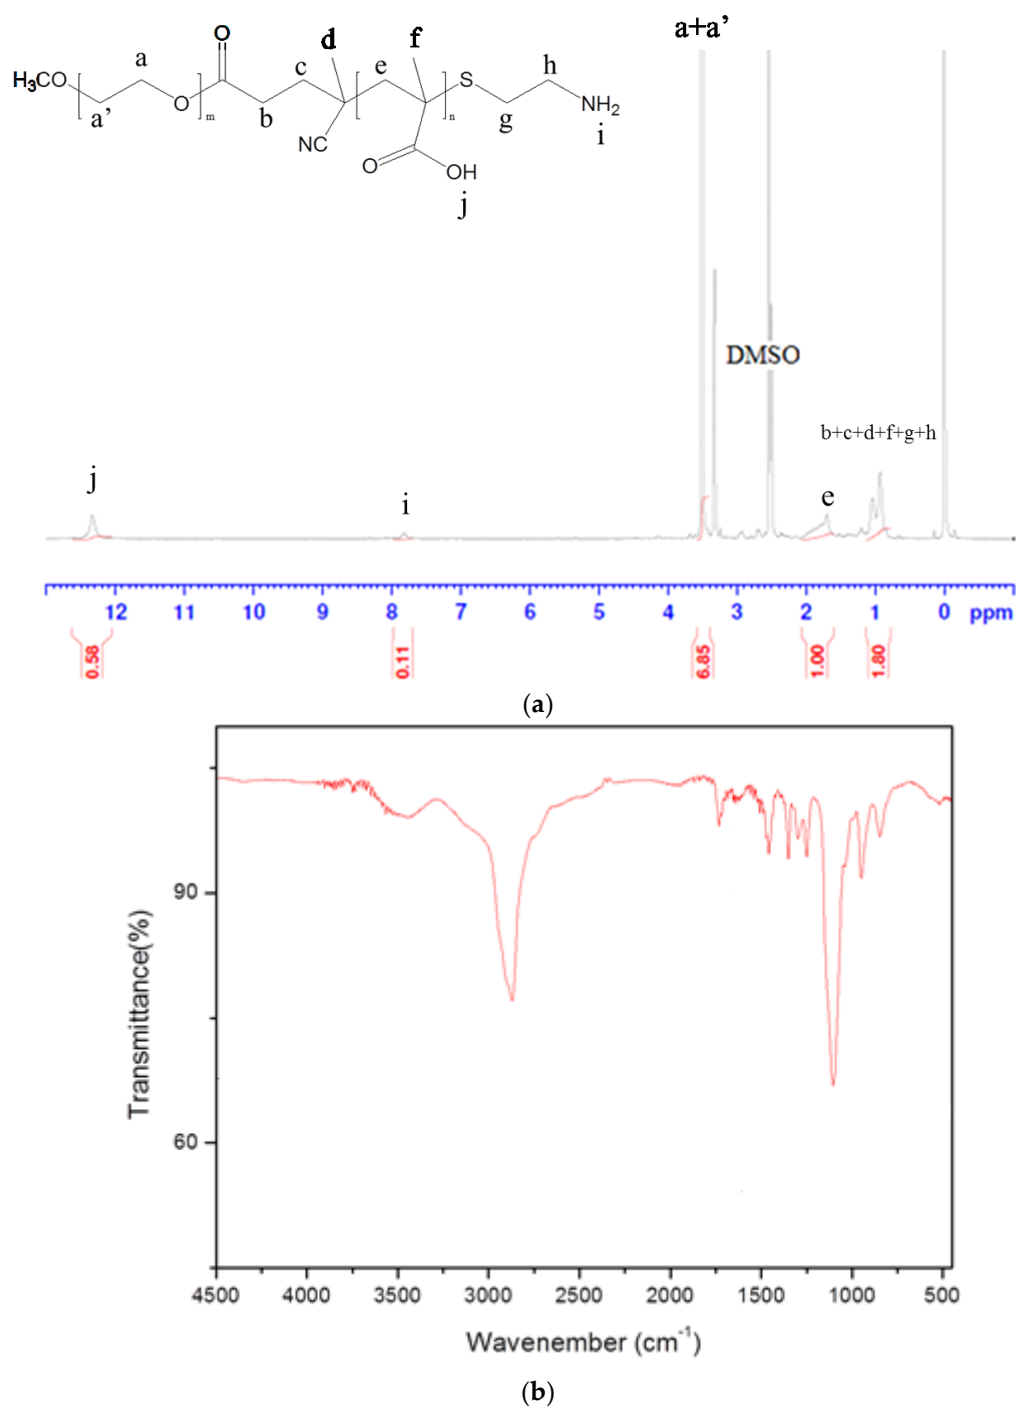

**Figure S1.** <sup>1</sup>H-NMR and FT-IR spectrum of the copolymer mPEG-*b*-P(MAAc)<sub>40</sub>-NH<sub>2</sub>. (a) The <sup>1</sup>H-NMR spectrum of the mPEG-*b*-P(MAAc)<sub>40</sub>-NH<sub>2</sub>; (b) The FT-IR spectrum of mPEG-*b*-P(MAAc)<sub>40</sub>-NH<sub>2</sub>.

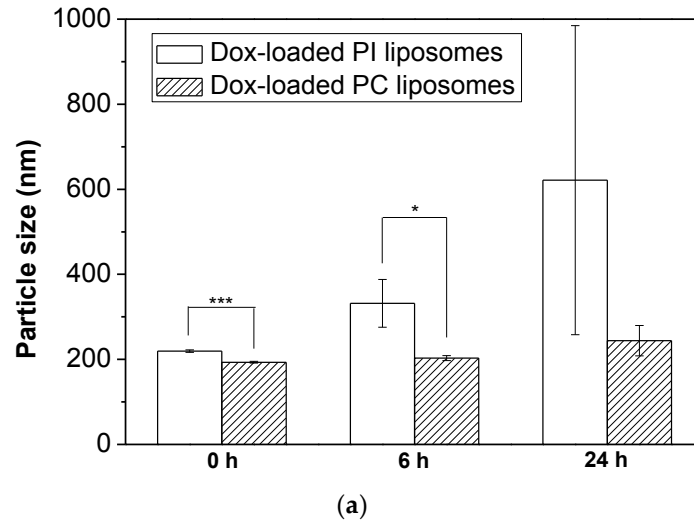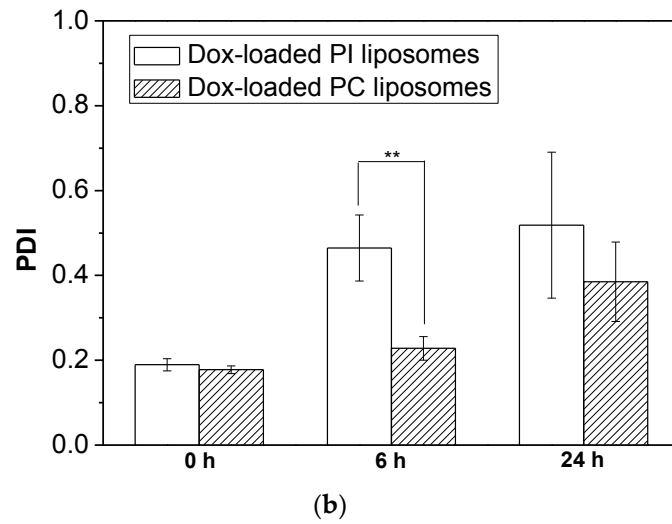

**Figure S2.** Stability of the Dox-loaded PI liposomes and PC liposomes. Liposomal samples were incubated at 37 °C pH 7.4 condition. After 6 and 24 h, the particle sizes and PDIs were measured using DLS. (a) The particle size of Dox-loaded polymer-liposomes; (b) The PDI of Dox-loaded polymer-liposomes. \*  $p < 0.05$ ; \*\*  $p < 0.001$ ; \*\*\*  $p < 0.0005$ .
